# Supplementary material for: Large-Scale Genome-Wide Association Analysis Reveals Candidate Genes in Yak Body Size Traits
Source: Research Square preprint supplement (doi:10.21203/rs.3.rs-6282023/v1), 2025-05-09
Supplement: Supplementary file 1 [file 8b5d8bb2957d1960d00d983f.docx]

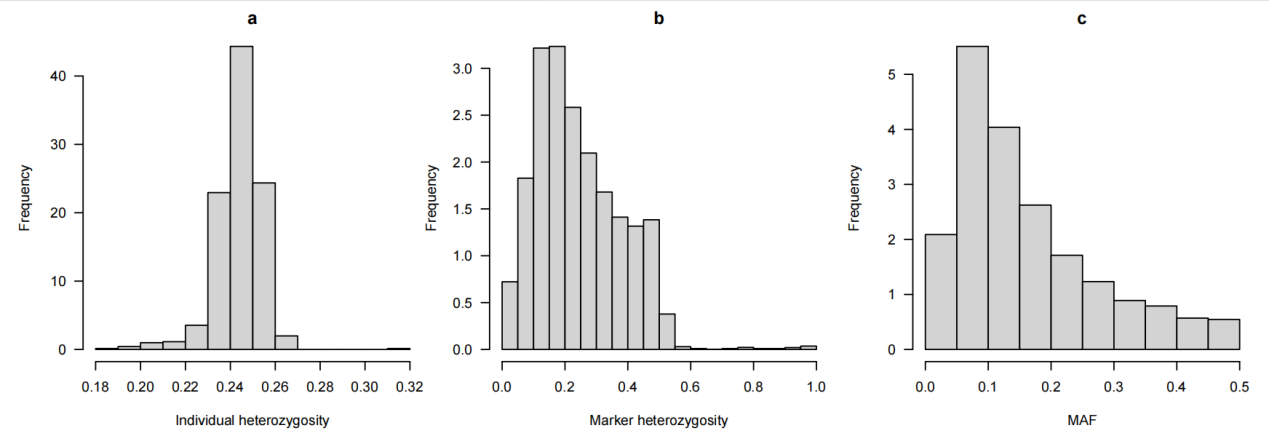


**Figure S1. Heterozygosity and Minor Allele Frequency.**

This figure shows the frequency distribution of heterozygosity and minor allele frequency (MAF)for yak individuals and genomic markers.


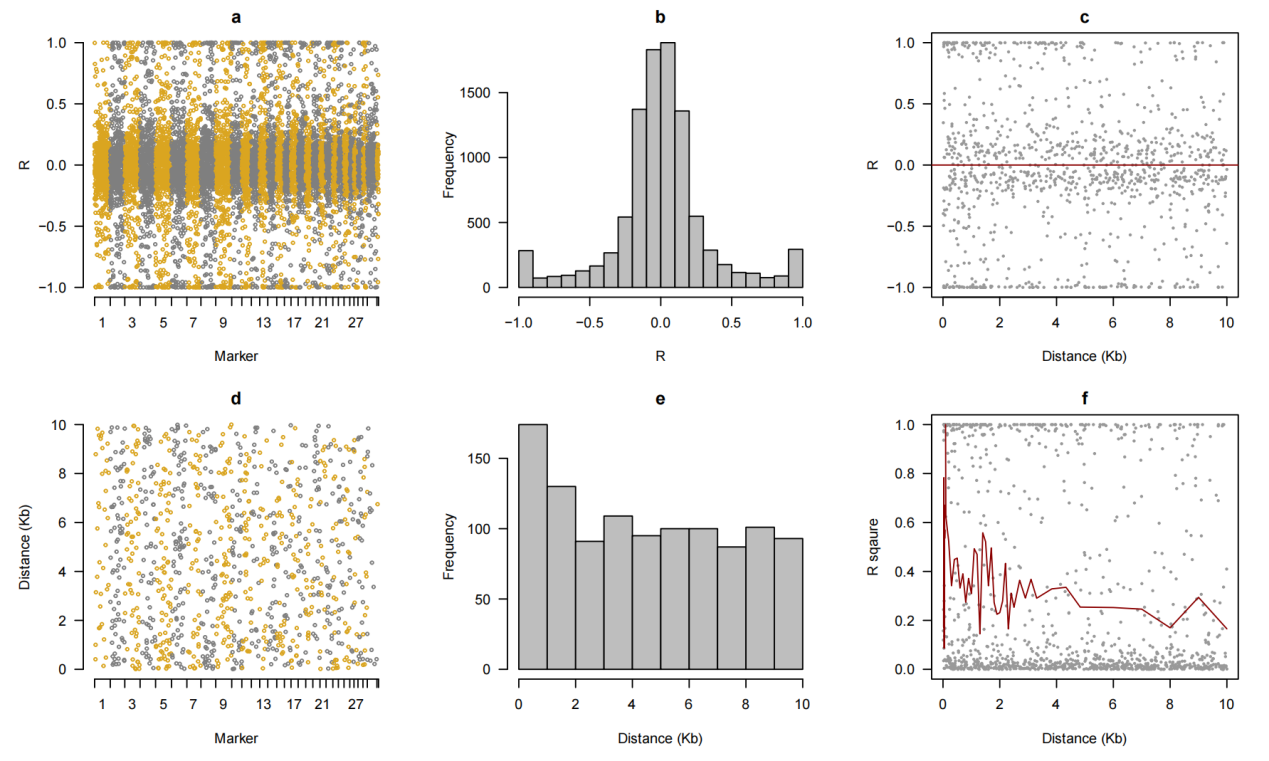


**Figure S2.Statistical Analysis of Genomic Marker.**

This figure presents a comprehensive statistical analysis of genomic markers, focusing primarily on the correlation between markers and the physical distance between them. It also visualizes the relationship between correlation and distance, with the red curve illustrating the decay trend of R

square with increasing distance.


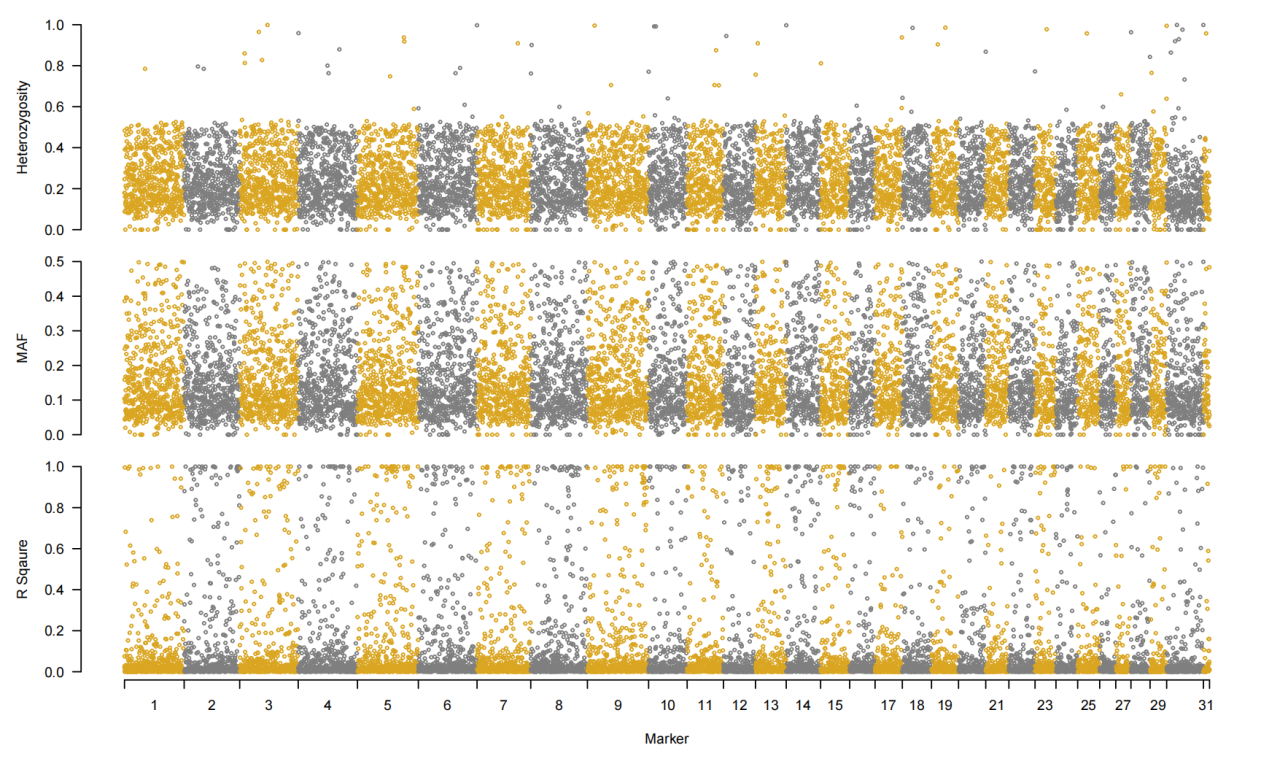


**Figure S3.** **Distribution of Heterozygosity, Minor Allele Frequency, and R² across Marker Loci on the Genome.**

This figure shows the distribution of heterozygosity, minor allele frequency (MAF), and R Square across different marker loci in the yak genome. The X-axis represents genomic markers, ranging from Chromosome 1 to Chromosome 31. Each point indicates the value of a genomic marker for a specific characteristic.


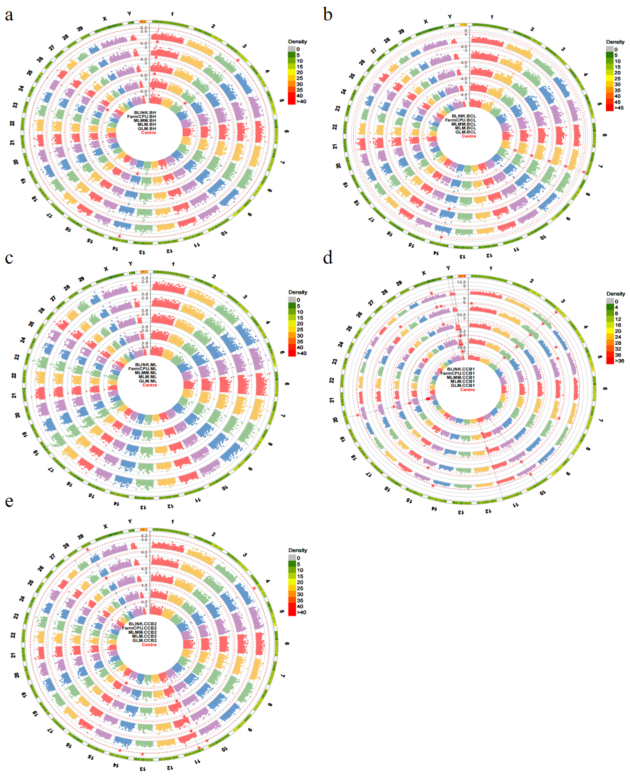


**Figure S4. Manhattan plots for the other five body size traits in yaks.**

The circular Manhattan plots based on five models identified significant loci associated with the other body size traits in yaks, with the five Manhattan plots corresponding to the body size traits BH, BCL, ML, CC, and CCB2.


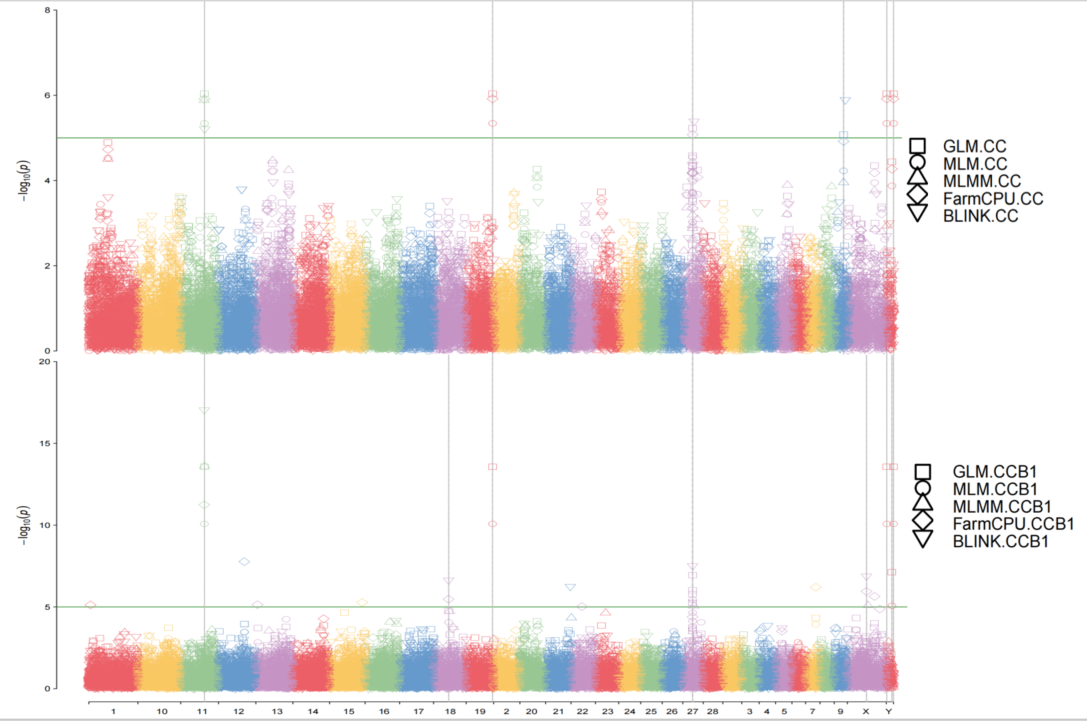


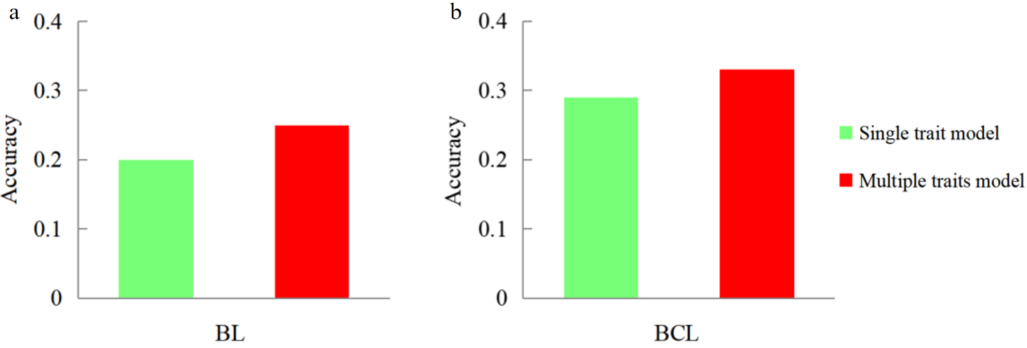


**Figure S5. Single and Multiple Trait Model Accuracy for Body Length and Body Canted Length in Yaks.**

For single-trait genomic selection, it is consistent with the manuscript. For multi-trait genomic selection, one-fifth of the relative traits will be omitted, and four-fifths of the relative traits will be used to predict the interesting trait.

**Table S1. Mean and Standard Deviation of Body Size Traits in Yaks by Age**

|  | BL | BH | ML | BCL | CCB1 | CC | CCB2 |
| --- | --- | --- | --- | --- | --- | --- | --- |
| ≤2 | 0.738±0.188 | 0.820±0.111 | 0.172±0.028 | 0.784±0.143 | 0.043±0.017 | 0.241±0.056 | 0.047±0.012 |
| 3 | 0.734±0.101 | 0.835±0.100 | 0.170±0.030 | 0.801±0.102 | 0.053±0.012 | 0.262±0.052 | 0.045±0.011 |
| 4 | 0.764±0.112 | 0.872±0.085 | 0.183±0.040 | 0.832±0.110 | 0.049±0.015 | 0.266±0.049 | 0.047±0.013 |
| 5 | 0.763±0.104 | 0.859±0.118 | 0.172±0.028 | 0.830±0.104 | 0.046±0.017 | 0.261±0.055 | 0.045±0.011 |
| 6 | 0.802±0.086 | 0.882±0.091 | 0.195±0.036 | 0.876±0.086 | 0.047±0.018 | 0.271±0.073 | 0.045±0.010 |
| 7 | 0.785±0.106 | 0.881±0.105 | 0.197±0.037 | 0.860±0.115 | 0.045±0.018 | 0.258±0.059 | 0.046±0.012 |
| 8 | 0.798±0.103 | 0.907±0.086 | 0.201±0.029 | 0.886±0.104 | 0.053±0.015 | 0.282±0.054 | 0.043±0.010 |
| 9 | 0.811±0.087 | 0.900±0.080 | 0.200±0.032 | 0.887±0.084 | 0.048±0.017 | 0.269±0.057 | 0.044±0.011 |

This table presents the mean and standard deviation (SD) for various body size traits of yaks at different ages, from 2 to 9 years old. These data provide insights into the development of yak body size traits as they age.

This table presents the mean and standard deviation (SD) for various body size traits of yaks at different ages, from 2 to 9 years old. These data provide insights into the development of yak body size traits as they age.

| Age（years）  Trait | BL | BH | ML | BCL | CCB1 | CC | CCB2 |
| --- | --- | --- | --- | --- | --- | --- | --- |
| 2 | 0.738±0.188 | 0.820±0.111 | 0.172±0.028 | 0.784±0.143 | 0.043±0.017 | 0.241±0.056 | 0.047±0.012 |
| 3 | 0.734±0.101 | 0.835±0.100 | 0.170±0.030 | 0.801±0.102 | 0.053±0.012 | 0.262±0.052 | 0.045±0.011 |
| 4 | 0.764±0.112 | 0.872±0.085 | 0.183±0.040 | 0.832±0.110 | 0.049±0.015 | 0.266±0.049 | 0.047±0.013 |
| 5 | 0.763±0.104 | 0.859±0.118 | 0.172±0.028 | 0.830±0.104 | 0.046±0.017 | 0.261±0.055 | 0.045±0.011 |
| 6 | 0.802±0.086 | 0.882±0.091 | 0.195±0.036 | 0.876±0.086 | 0.047±0.018 | 0.271±0.073 | 0.045±0.010 |
| 7 | 0.785±0.106 | 0.881±0.105 | 0.197±0.037 | 0.860±0.115 | 0.045±0.018 | 0.258±0.059 | 0.046±0.012 |
| 8 | 0.798±0.103 | 0.907±0.086 | 0.201±0.029 | 0.886±0.104 | 0.053±0.015 | 0.282±0.054 | 0.043±0.010 |
| 9 | 0.811±0.087 | 0.900±0.080 | 0.200±0.032 | 0.887±0.084 | 0.048±0.017 | 0.269±0.057 | 0.044±0.011 |

**Table S1. Mean and Standard Deviation of Body Size Traits in Yaks by Age**

**Table S2. Estimated Heritability for Body Size Traits in Yaks**

| Trait | Heritability (%) |
| --- | --- |
| BL | 6.5 |
| BH | 14 |
| BCL | 4.1 |
| ML | 2.5 |
| CCB1 | 47.8 |
| CC | 23.5 |
| CCB2 | 22.4 |

This table summarizes the heritability estimates (expressed as a percentage) for various body size traits in yaks. The heritability values indicate the proportion of phenotypic variance that can be caused by genetic variance, providing the possibility of obtaining desirable traits during selection in breeding.

**Table S3. Significant SNP and candidate gene information**

| SNP No. * | Chr | Position (bp) | Gene ID | Gene Name |
| --- | --- | --- | --- | --- |
| S1_32191242 | 1 | 32191242 | ENSBGRG00000000082 | GRIK1 |
| S3_97322275 | 3 | 97322275 | ENSBGRG00000000593 | PRKAA2 |
| S4_65614224 | 4 | 65614224 | ENSBGRG00000001001 | ELMO1 |
| S4_91144655 | 4 | 91144655 | ENSBGRG00000021923 | SEMA3E |
| S5_6249370 | 5 | 6249370 | ENSBGRG00000001184 | GRIN2B |
| S6_28171330 | 6 | 28171330 | ENSBGRG00000012752 | CNOT6L |
| S6_64894237 | 6 | 64894237 | ENSBGRG00000003070 | SMIM14 |
| S7_114182165 | 7 | 114182165 | ENSBGRG00000002267 | MSRA |
| S7_114275665 | 7 | 114275665 | ENSBGRG00000002267 | MSRA |
| S10_106316722 | 10 | 106316722 | ENSBGRG00000026688 | SNX9 |
| S11_15246495 | 11 | 15246495 | ENSBGRG00000005875 | LHFPL2 |
| S11_92286727 | 11 | 92286727 | ENSBGRG00000004582 | PTPN21 |
| S13_51683778 | 13 | 51683778 | ENSBGRG00000009791 | ABCC8 |
| S14_43229824 | 14 | 43229824 | ENSBGRG00000013922 | CAMTA1 |
| S20_34062188* | 20 | 34062188 | ENSBGRG00000021795 | gene_source ensembl |
| S20_34082808* | 20 | 34082808 | ENSBGRG00000022357 | gene_source ensembl |
| S20_34180196 | 20 | 34180196 | ENSBGRG00000024966 | TCF25 |
| S20_34180196 | 20 | 34180196 | ENSBGRG00000025749 | SPIRE2 |
| S20_34237476 | 20 | 34237476 | ENSBGRG00000024966 | TCF25 |
| S20_34237476 | 20 | 34237476 | ENSBGRG00000026229 | FANCA |
| S25_48455758 | 25 | 48455758 | ENSBGRG00000007473 | EEF1AKMT2 |
| SX_61170346 * | X | 61170346 | ENSBGRG00000020130 | gene_source ensembl |
| SX_94995867 | X | 94995867 | ENSBGRG00000021471 | CACNA1F |

* SNP No. indicates the sequence number in the entire tag list. Chromosomes and locations refer to physical location information in genomic data. The gene names are annotated from the GTF file of the Bosgru_v3.0 reference genome. The significant loci marked with an asterisk (*) in the upper right corner were not annotated with gene names in yak, but were annotated with gene names in species such as Orcinus orca and Ovis aries.
